# Supplementary material for: Purification, characterization, and hypoglycemic properties of eurocristatine from Eurotium cristatum spores in Fuzhuan brick tea
Source: Royal Society of Chemistry journal article supplement (doi:10.1039/d0ra03423a), 2020-01-01
Supplement: d0ra03423a1.pdf [file d0ra03423a1.pdf]

1 e-Component

2

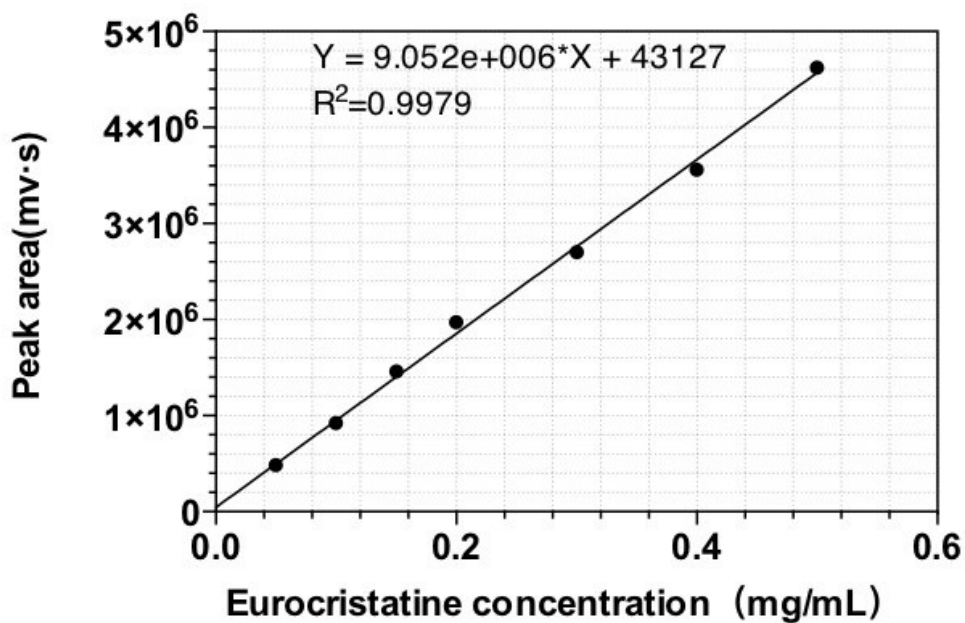

3

4

Fig. S1. Linear graph of eurocristatine concentration and its peak area.

5

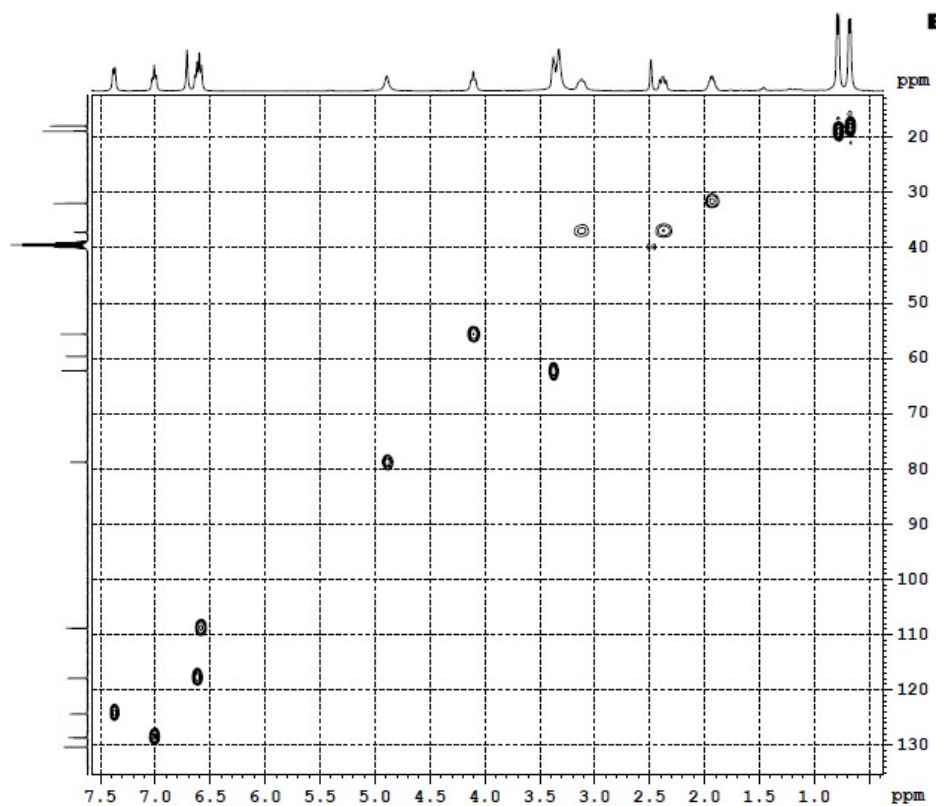

6

7

Fig. S2. HSQC spectra of eurocristatine.

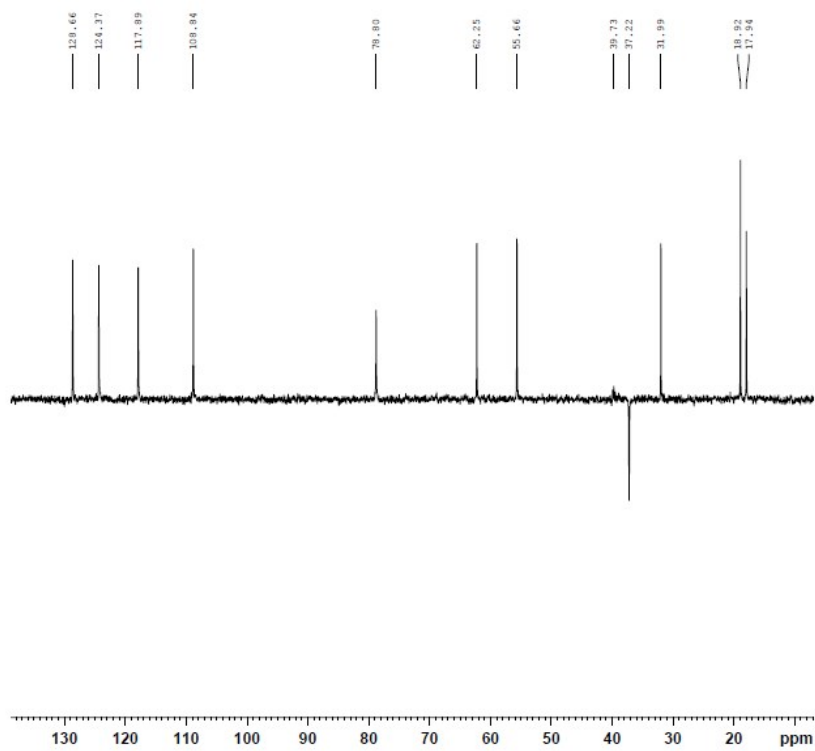

**Fig. S3.** DEPT spectra of eurocristatine.

8  
9  
10  
11  
12  
13  
14  
15  
16  
17  
18  
19  
20  
21

22

23

**Table S1.** The <sup>1</sup>H NMR spectrum data of eurocristatine

24

| position | chemical shift (ppm) | Multiplicity | Number of protons | Coupling constant J(Hz) | Remark |
|----------|----------------------|--------------|-------------------|-------------------------|--------|
| 1        | 8.25                 | s            | 1                 |                         | 14-NH  |
| 2        | 7.38                 | d            | 1                 | 7.2                     | H6     |
| 3        | 7.01                 | dd           | 1                 | 8.0, 8.0                | H7     |
| 4        | 6.71                 | s            | 1                 |                         | 1-NH   |
| 5        | 6.62                 | dd           | 1                 | 8.0, 8.0                | H6     |
| 6        | 6.59                 | d            | 1                 | 8.0                     | H8     |
|          | 4.89                 | brs          | 1                 |                         | H2     |
|          | 3.38                 | s            | 1                 |                         | H15    |
|          | 3.12                 | brs          | 1                 |                         | H12a   |
|          | 2.38                 | dd           | 1                 | 14.0, 9.5               | H12b   |
|          | 1.93                 | m            | 1                 |                         | H17    |
|          | 0.79                 | t            | 3                 | 6.4                     | H18    |
|          | 0.68                 | t            | 3                 | 6.0                     | H19    |

25

26

27

28

**Table S2.** The <sup>13</sup>C NMR spectrum data of eurocristatine.

29

| position | chemical shift (ppm) | Multiplicity | Number of carbon atoms | Remark |
|----------|----------------------|--------------|------------------------|--------|
| 1        | 168.36               | s            | 1                      | C-13   |
| 2        | 167.44               | s            | 1                      | C-16   |
| 3        | 149.02               | s            | 1                      | C-9    |
| 4        | 130.37               | s            | 1                      | C-4    |
| 5        | 128.66               | d            | 1                      | C-7    |
| 6        | 124.37               | d            | 1                      | C-5    |
| 7        | 117.91               | d            | 1                      | C-6    |
| 8        | 108.86               | d            | 1                      | C-8    |
| 9        | 78.82                | d            | 1                      | C-2    |
| 10       | 62.27                | d            | 1                      | C-15   |
| 11       | 59.67                | s            | 1                      | C-3    |
| 12       | 55.67                | d            | 1                      | C-11   |
| 13       | 37.22                | t            | 1                      | C-12   |
| 14       | 31.99                | d            | 1                      | C-17   |
| 15       | 18.92                | q            | 1                      | C-18   |
| 16       | 17.96                | q            | 1                      | C-19   |

30
